# Supplementary material for: Sustainable synthesis of tunable emissive sulphur-doped CDs: a synergistic approach for metal ion sensing and antimicrobial applications
Source: Royal Society of Chemistry journal article supplement (doi:10.1039/d5ay00180c), 2025-01-01
Supplement: d5ay00180c1.pdf [file d5ay00180c1.pdf]

## **Supplementary Information**

### **Sustainable Synthesis of Tunable Emissive Sulphur-Doped CDs: A Synergistic Approach for Metal Ion Sensing and Antimicrobial Applications**

Sneha V. Koparde<sup>1,2</sup>, Omkar S. Nille<sup>1</sup>, Akanksha G. Kolekar<sup>1</sup>, Radhika Jadhav<sup>3</sup>, Arpita Pandey Tiwari<sup>3</sup>, Samadhan P. Pawar<sup>1,2,\*</sup>, Govind B. Kolekar<sup>1,\*</sup>

<sup>1</sup>Fluorescence Spectroscopy Research Laboratory, Department of Chemistry Shivaji University, Kolhapur-416004, (MS), India.

<sup>2</sup>Department of Chemistry, Rajarshi Chhatrapati Shahu College, Kolhapur-416003, (MS), India.

<sup>3</sup>Department of Medical Biotechnology and Stem Cell and Regenerative Medicine, D. Y. Patil Education Society, Kolhapur-416003, (MS), India.

---

#### **Corresponding Author:**

Prof. G. B. Kolekar

Senior Professor (Physical Chemistry), Department of Chemistry, Shivaji University, Kolhapur-416004, MS, India. \*Corresponding author: Email: [gbk\\_chem@unishivaji.ac.in](mailto:gbk_chem@unishivaji.ac.in)

Dr. Samadhan P. Pawar

Assistant Professor, Department of Chemistry, Rajarshi Chhatrapati Shahu College, Kolhapur-416003, (MS), India. \*Corresponding author: Email: [sampawar1987@gmail.com](mailto:sampawar1987@gmail.com)

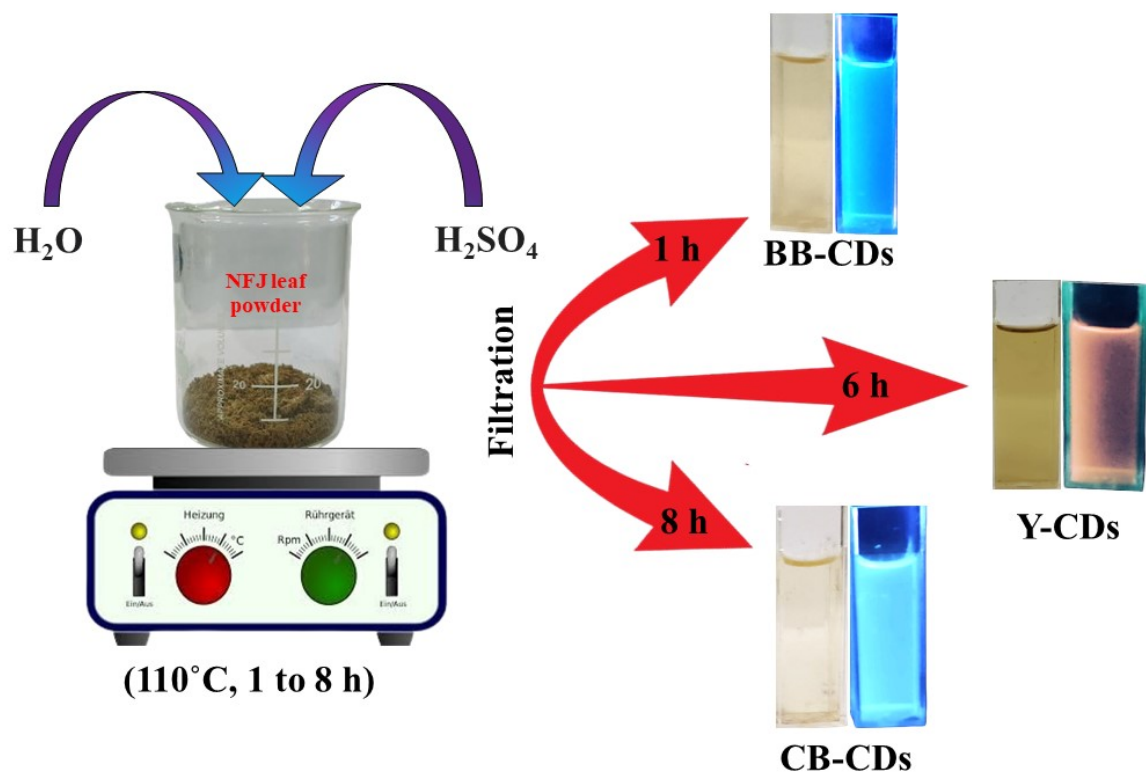

**Scheme S1.** Synthesis of BB-CDs, Y-CDs and CB-CDs.

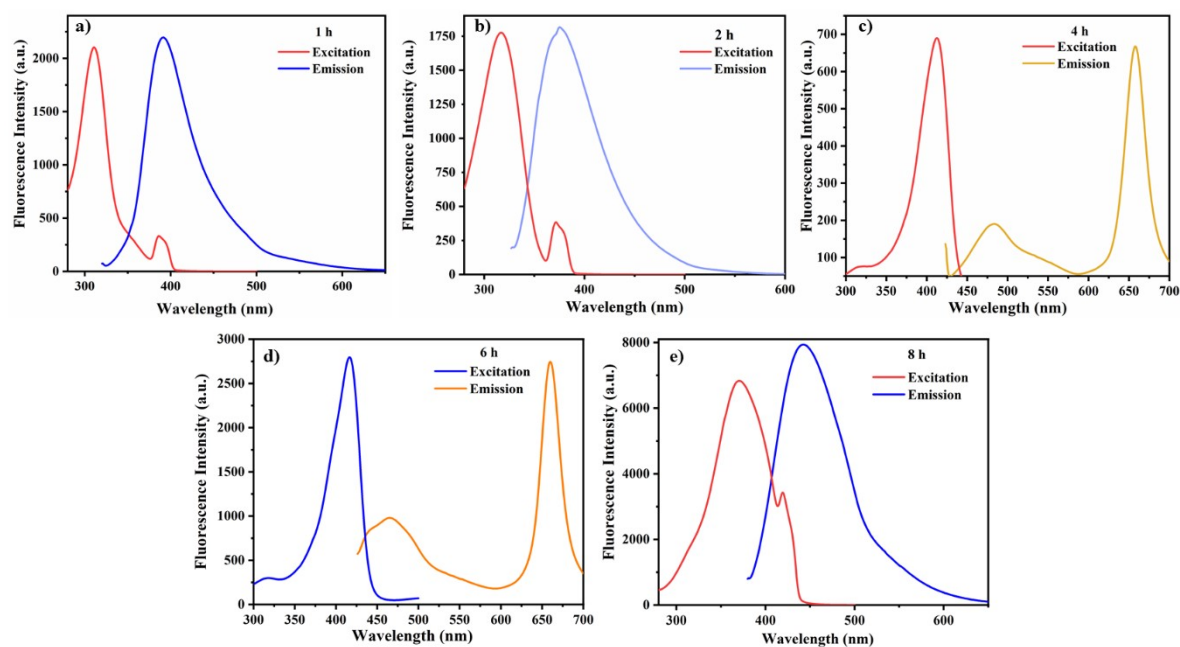

**Fig. S1** Fluorescence spectra of S-CDs at a) 1 h, b) 2 h, c) 4 h, d) 6 h, and e) 8 h.

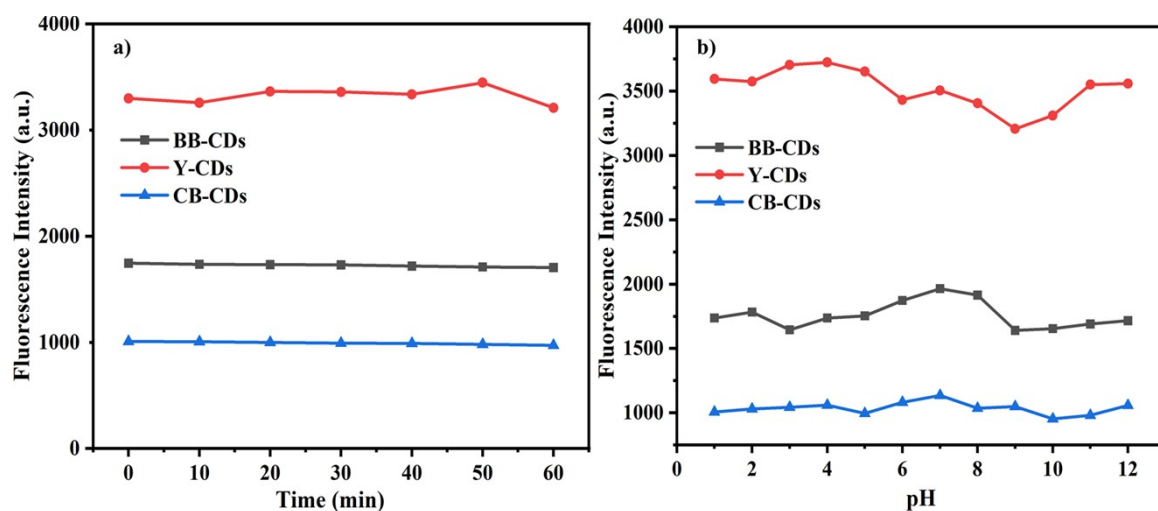

**Fig. S2** Fluorescence intensities of different S-CDs (BB-CDs, Y-CDs, CB-CDs) under the influence of a) irradiation of UV light, and b) different pH.

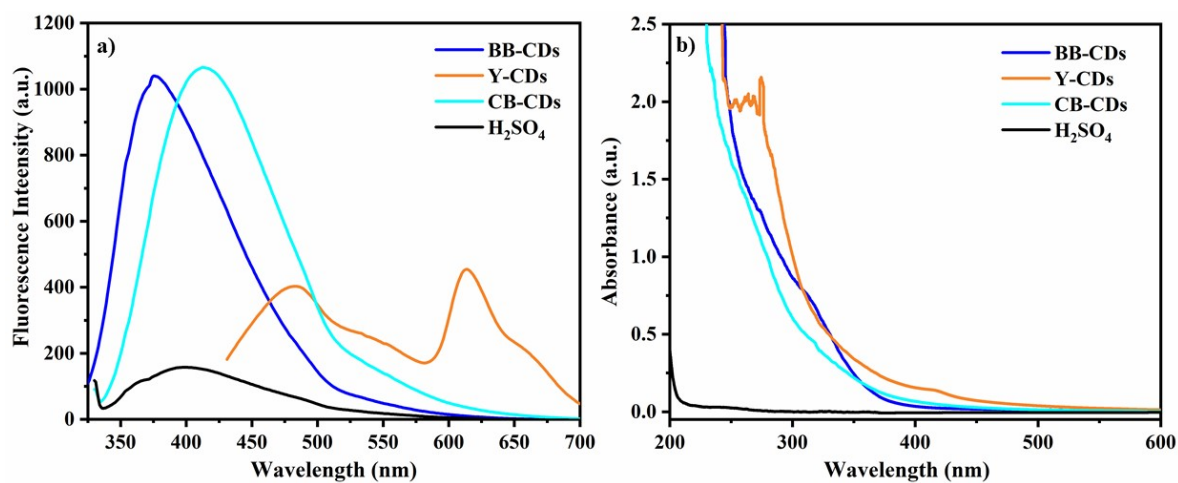

**Fig. S3** a) Fluorescence and b) UV-Visible absorbance spectra of neutralized BB-CDs, Y-CDs, CB-CDs and diluted  $H_2SO_4$ .

**Table S1.** Peak position of XPS elemental spectra.

| S-CDs      | C 1s       |             | O 1s       |             | S 2p       |             | S 2s       | N 1s       |             |
|------------|------------|-------------|------------|-------------|------------|-------------|------------|------------|-------------|
|            | BE<br>(eV) | Atomic<br>% | BE<br>(eV) | Atomic<br>% | BE<br>(eV) | Atomic<br>% | BE<br>(eV) | BE<br>(eV) | Atomic<br>% |
| BB-<br>CDs | 284.24     | 44.65       | 532.50     | 28.51       | 170.14     | 9.01        | 232.83     | 404.14     | 17.83       |
| Y-<br>CDs  | 284.24     | 37.01       | 532.50     | 33.19       | 170.14     | 11.48       | 231.50     | 404.14     | 18.32       |
| CB-<br>CDs | 288.5      | 37.08       | 533.93     | 34.25       | 171.40     | 9.68        | 234.14     | 404.14     | 19.00       |
